# Supplementary material
Source: PubMed Central journal article supplement (PMC2826810)
Supplement: NIHMS161204-supplement-Supp1.pdf [file NIHMS161204-supplement-Supp1.pdf]

## SUPPLEMENTAL MATERIAL

**Supplemental Table 1: Patients excluded from analysis**

| <b>Reason for exclusion</b>                   | <b># of patients</b> | <b>% of total</b> |
|-----------------------------------------------|----------------------|-------------------|
| Mutation other than deletion                  | 65                   | 32.2              |
| Deletion > 12 exons                           | 7                    | 3.5               |
| Insufficient cardiac information <sup>a</sup> | 97                   | 48.0              |
| Possible DMD <sup>b</sup>                     | 5                    | 2.5               |
| Suspected Viral Myocarditis                   | 2                    | 1.0               |
| No cardiac dystrophin expression <sup>c</sup> | 18                   | 8.9               |
| Other <sup>d</sup>                            | 8                    | 4.0               |
| <b>Total</b>                                  | <b>202</b>           | <b>100</b>        |

- <sup>a</sup>. Information on the patient age at the time of cardiac evaluation was missing, or, for published case reports, a qualitative description without specific echocardiography measurements was provided.
- <sup>b</sup>. These patients were diagnosed as BMD but were either wheelchair dependent in their early teens, or younger than 12 years of age, had no family history of the disease, had out-of-frame deletion mutations, and a severe skeletal muscle involvement.
- <sup>c</sup>. Among these patients, 17 had mutations affecting non-coding regions some of which were not deletions <sup>1-7</sup>. Only one patient in this category has a deletion mutation affecting the coding region. These patients represent 8 independent families.
- <sup>d</sup>. These patients had deletions of 12 or less exons within the rod domain affecting exons 12 to 44. Because of their heterogeneity and low number they could not be included in the current analysis.

## References:

1. Ferlini A, Galie N, Merlini L, Sewry C, Branzi A, Muntoni F. A novel Alu-like element rearranged in the dystrophin gene causes a splicing mutation in a family with X-linked dilated cardiomyopathy. *Am J Hum Genet.* 1998;63(2):436-446.
2. Bies RD, Maeda M, Roberds SL, Holder E, Bohlmeier T, Young JB, Campbell KP. A 5' dystrophin duplication mutation causes membrane deficiency of alpha-dystroglycan in a family with X-linked cardiomyopathy. *J Mol Cell Cardiol.* 1997;29(12):3175-3188.
3. Saotome M, Yoshitomi Y, Kojima S, Kuramochi M. Dilated cardiomyopathy of Becker-type muscular dystrophy with exon 4 deletion--a case report. *Angiology.* 2001;52(5):343-347.
4. Yoshida K, Ikeda S, Nakamura A, Kagoshima M, Takeda S, Shoji S, Yanagisawa N. Molecular analysis of the Duchenne muscular dystrophy gene in patients with Becker muscular dystrophy presenting with dilated cardiomyopathy. *Muscle Nerve.* 1993;16(11):1161-1166.
5. Muntoni F, Wilson L, Marrosu G, Marrosu MG, Cianchetti C, Mestroni L, Ganau A, Dubowitz V, Sewry C. A mutation in the dystrophin gene selectively affecting dystrophin expression in the heart. *J Clin Invest.* 1995;96(2):693-699.
6. Muntoni F, Cau M, Ganau A, Congiu R, Arvedi G, Mateddu A, Marrosu MG, Cianchetti C, Realdi G, Cao A, Melis MA. Brief report: deletion of the dystrophin muscle-promoter region associated with X-linked dilated cardiomyopathy. *N Engl J Med.* 1993;329(13):921-925.
7. Milasin J, Muntoni F, Severini GM, Bartoloni L, Vatta M, Krajinovic M, Mateddu A, Angelini C, Camerini F, Falaschi A, Mestroni L, Giacca M. A point mutation in the 5' splice site of the dystrophin gene first intron responsible for X-linked dilated cardiomyopathy. *Hum Mol Genet.* 1996;5(1):73-79.

**Supplemental Table 2: Affected patients.**

| ID     | Deleted Exons | Dx         | Source          | Clinical information                                                                                                                                                                                                                                                                                                                                                                                        | Cardiac information                                                                                                                                                                                                                                                                                                                                                        | Age* (Years) | Group |
|--------|---------------|------------|-----------------|-------------------------------------------------------------------------------------------------------------------------------------------------------------------------------------------------------------------------------------------------------------------------------------------------------------------------------------------------------------------------------------------------------------|----------------------------------------------------------------------------------------------------------------------------------------------------------------------------------------------------------------------------------------------------------------------------------------------------------------------------------------------------------------------------|--------------|-------|
| 3      | 2-7           | XLDCM, BMD | [1] (Patient 1) | Age at consultation: 33 years. Mild myopathy with preferential cardiac involvement beginning from the second decade of life. CK= 800 U/L. Biopsy showed increased central nucleation, fiber splitting and fiber size variation, carnitine deficiency. Slightly fainter dystrophin staining intensity than normal controls. Western blot: reduced dystrophin size. Brother of #251. Negative family history. | Severe congestive cardiomyopathy. EF= 25%.                                                                                                                                                                                                                                                                                                                                 | 28           | 1     |
| 251    | 2-7           | XLDCM, BMD | [1] (Patient 2) | Age at consultation: 28 years. Mild myopathy with preferential cardiac involvement beginning from the second decade of life. CK= 2000 U/L. Biopsy showed mild myopathy, increased numbers of central nuclei and fiber splitting, fiber size variation. Slightly fainter dystrophin staining intensity than normal controls. Western blot: reduced dystrophin size. Brother of #3. Negative family history.  | Severe congestive cardiomyopathy. EF= 45%.                                                                                                                                                                                                                                                                                                                                 | 28           | 1     |
| SL1032 | 3             | BMD        | UDP             | Onset of skeletal muscle symptoms: 2 years. Age at diagnosis: 5.5 years. Toe walking. Wheelchair dependent: 30 years. Vignos Scale (34 years): upper = 3 / lower = 9.                                                                                                                                                                                                                                       | EF = 35%. Palpitations. Peripheral edema. Clinically significant arrhythmia. Heart transplant at 34 years.                                                                                                                                                                                                                                                                 | 23           | 1     |
| MJ03   | 3             | BMD        | MDAc            | Age at diagnosis: 8 years. Calf hypertrophy. CK = 18,000 U/L. Ambulant at age 14. Negative family history.                                                                                                                                                                                                                                                                                                  | Cardiac data at 13 years of age: EF = 50%.<br><br>Cardiac data at 16 years of age: SF = 28.39%, LV diastolic septal thickness: 0.80cm, LVIDd = 55.3mm (1.02 z-score), LV diastolic wall thickness: 0.80cm. No global LV dysfunction, overall LV systolic wall motion is low-normal.<br><br>Cardiac data at 18 years of age: LVID = 1.2sd, EPSS = 14mm, SF = 23%, EF = 45%. | 13           | 1     |

| ID     | Deleted Exons | Dx         | Source               | Clinical information                                                                                                                                                                                                                                | Cardiac information                                                                                                                                                                                                                                                                                                                                                             | Age* (Years) | Group |
|--------|---------------|------------|----------------------|-----------------------------------------------------------------------------------------------------------------------------------------------------------------------------------------------------------------------------------------------------|---------------------------------------------------------------------------------------------------------------------------------------------------------------------------------------------------------------------------------------------------------------------------------------------------------------------------------------------------------------------------------|--------------|-------|
| SL187  | 3-7           | BMD        | UDP                  | Onset of skeletal muscle symptoms: 1 year. Elevated CK. Vignos Scale (24 years): upper = 1 / lower = 3. Positive family history.                                                                                                                    | DCM diagnosis. EF = 25%, SF = 8%. Heart transplant at 22 years.                                                                                                                                                                                                                                                                                                                 | 22           | 1     |
| MJ18   | 3-7           | BMD        | MDAc                 | Age at consultation and diagnosis: 25 years. Diffuse muscle stiffness, cramping, weakness. CK = 1200~2000 U/L. Biopsy showed mild muscle fiber atrophy with mild focal chronic inflammation.                                                        | Normal ECG. All valves normal, LV global systolic dysfunction and hypokinesia, EF = 35%.                                                                                                                                                                                                                                                                                        | 29           | 1     |
| SL59   | 3-7           | BMD        | MDAc                 | Onset of skeletal muscle symptoms: 3 years. Diagnosis: 10years. Wheelchair dependent: 25.5 years. Negative family history.                                                                                                                          | EF <20%; SF = 22%.                                                                                                                                                                                                                                                                                                                                                              | 41           | 1     |
| SL1077 | 3-11          | BMD        | UDP                  | Symptom of weakness. Wheelchair dependent: 17 years. Negative family history.                                                                                                                                                                       | EF = 17%, SF = 8%.                                                                                                                                                                                                                                                                                                                                                              | 19           | 1     |
| 20     | 5             | XLDCM      | [2] (Patient DCM 10) | Age at consultation: 12 years. Presented to the emergency room with dyspnoea, diaphoresis and vomiting for one week. Neurological exam showed no skeletal myopathy or abnormalities. CK = 270 U/L. Negative family history.                         | DCM diagnosis. LVEDd = 58mm (Z score 5.2), SF = 16%, EF = 30%. Moderate mitral regurgitation.                                                                                                                                                                                                                                                                                   | 12           | 1     |
| 157    | 5-9           | BMD, XLDCM | [3] (Patient 4)      | Onset of skeletal muscle symptoms: 17 years. Age at consultation: 33 years. Wheelchair dependent.                                                                                                                                                   | Severe DCM, polymorphic PVCs. Symptoms of heart failure.                                                                                                                                                                                                                                                                                                                        | 33           | 1     |
| 140    | 6-13          | XLDCM, BMD | [4]                  | Age at consultation: 14 years. Neurological exam: mild generalized muscle weakness, slight muscular atrophy with a limb-girdle distribution. CK = 5-15ukat/l (normal <3.3ukat/l). Normal EMG. Biopsy showed mild myopathy. Negative family history. | Congestive heart failure symptoms. Cardiomegaly by chest X-ray. ECG: tachycardia, left atrial and ventricular hypertrophy, and strain. LVEDd = 82 mm, SF = 11%, considerable left atrial dilatation. No coronary artery abnormalities per angiography. Patient died 1 month later. <i>Cardiac biopsy</i> : non-specific changes with interstitial fibrosis compatible with DCM. | 14           | 1     |

| ID  | Deleted Exons | Dx  | Source                | Clinical information                                                                                                                                                                                | Cardiac information                                                                                                                                                                                                                       | Age* (Years) | Group |
|-----|---------------|-----|-----------------------|-----------------------------------------------------------------------------------------------------------------------------------------------------------------------------------------------------|-------------------------------------------------------------------------------------------------------------------------------------------------------------------------------------------------------------------------------------------|--------------|-------|
| 250 | 45            | BMD | [5]<br>(Patient 2)    | Age at consultation: 31 years. Mild progressive limb-girdle weakness, calf pseudohypertrophy, elevated CK. Biopsy showed discontinuous dystrophin staining.                                         | LVEDd = 58mm, LVEDs = 47mm, EF = 47%, LV posterior wall = 10mm, Interventricular septum = 12mm. <i>Cardiac Biopsy</i> : No interstitial fibrosis. Dystrophin staining: discontinuous (partial or intermittent surface membrane staining). | 31           | 2     |
| 145 | 45            | BMD | [6]<br>(Patient 6)    | Age at consultation: 26 years. Major impairment of motor function. Wheelchair dependent. FVC = 42%.                                                                                                 | ECG showed tall R wave in V1, lateral Q and T abnormal. QTc: 441ms. QT/PQ = 8.6. LVEDd = 66mm. SF = 13%.                                                                                                                                  | 26           | 2     |
| 193 | 45-47         | BMD | [7]<br>(Patient 1)    | CK=265 U/L. Negative family history.                                                                                                                                                                | Onset of congestive heart failure symptoms. EF = 25%. <i>Cardiac Biopsy</i> : dystrophin staining showed reduced with rod domain antibody, irregular with amino- and carboxyl-terminal antibodies.                                        | 22           | 2     |
| 253 | 45-47         | BMD | [8]                   | Age at consultation: 37 years. Muscle weakness present.                                                                                                                                             | LVEDd = 58mm, EF = 42%.                                                                                                                                                                                                                   | 37           | 2     |
| 110 | 45-47         | BMD | [9]<br>(Patient 20)   | Age at consultation: 20 years. Clinical Severity: Mild. Dystrophin staining showed small number of negative fibers. Western blot: reduced amount (40%) and size (360 kDa). Positive family history. | Normal ECG. Normal Holter ECG. Normal LA volume. LV EDV = 64 mL/m <sup>2</sup> . EF = 53%. LV wall motion: normal. RV EDV = 57 mL/m <sup>2</sup> . RVEF = 70%. Normal RV wall motion.                                                     | 20           | 2     |
| 189 | 45-47         | BMD | [10]<br>(Patient B27) | Age at consultation: 35 years. Cramps, myalgia, myoglobinuria, calf hypertrophy. CK = 378 U/L. Western blot: Normal dystrophin amount but reduced size (380 kDa).                                   | ECG showed LBBB. Holter ECG showed polymorphic ventricular arrhythmias (Lown grade 3). LVEDV = 85 mL/m <sup>2</sup> . EF = 39%. LV wall motion: anterior septum akinesia.                                                                 | 35           | 2     |
| 141 | 45-47         | BMD | [6]<br>(Patient 1)    | Age at consultation: 17 years. Minor impairment of motor function. FVC = 96%.                                                                                                                       | ECG showed incomplete RBBB, QTc: 399ms. QT/PQ = 10.7. LVEDd = 51mm. SF = 24%.                                                                                                                                                             | 17           | 2     |
| 148 | 45-47         | BMD | [6]<br>(Patient 12)   | Age at consultation: 22 years. Minor impairment of motor function. FVC = 98%.                                                                                                                       | Normal ECG. QTc: 391ms. QT/PQ = 11.80. LVEDd = 55mm. SF = 29%.                                                                                                                                                                            | 22           | 2     |
| 149 | 45-47         | BMD | [6]<br>(Patient 14)   | Age at consultation: 26 years. Minor impairment of motor function. FVC = 98%.                                                                                                                       | Normal ECG. QTc: 402ms. QT/PQ = 18.00. LVEDd = 55mm. SF = 16%.                                                                                                                                                                            | 26           | 2     |

| ID     | Deleted Exons | Dx         | Source          | Clinical information                                                                                                                                                                                                                                                                                                                                                                          | Cardiac information                                                                                                                                                                                                                                                                                                                                          | Age* (Years) | Group |
|--------|---------------|------------|-----------------|-----------------------------------------------------------------------------------------------------------------------------------------------------------------------------------------------------------------------------------------------------------------------------------------------------------------------------------------------------------------------------------------------|--------------------------------------------------------------------------------------------------------------------------------------------------------------------------------------------------------------------------------------------------------------------------------------------------------------------------------------------------------------|--------------|-------|
| 138    | 45-47         | BMD, XLDCM | [11]            | Onset of skeletal muscle symptoms: 19 years. Wheelchair dependent at 34 years. Positive family history.                                                                                                                                                                                                                                                                                       | Cardiomegaly by chest X ray. ECG showed complete AV block, varying heart rate between 30–36 beats/minute. EF = 30%. Doppler showed mild-to-moderate mitral regurgitation.<br><br>Family: Brother diagnosed with BMD and DCM.                                                                                                                                 | 49           | 2     |
| SL1325 | 45-47         | BMD        | MDAc            | Onset of skeletal muscle symptoms: 13 years. Diagnosed: 16 years. Symptoms: weakness, myalgias, cramping. Vignos Scale (28 years): upper = 1 / lower = 1.                                                                                                                                                                                                                                     | Echo (18 years): abnormal, low EF. Echo (24 years): EF= 20%                                                                                                                                                                                                                                                                                                  | 18           | 2     |
| SL1127 | 45-47         | BMD        | MDAc            | Onset of skeletal muscle symptoms: 11 years. Diagnosed: 22 years. Symptoms: weakness, myalgias, cramping. Vignos Scale (29 years): upper = 1 / lower = 1.                                                                                                                                                                                                                                     | EF = 30%                                                                                                                                                                                                                                                                                                                                                     | 29           | 2     |
| 197    | 45-47         | BMD, XLDCM | [7] (Patient 5) | CK=104-837U/L. Negative family history.                                                                                                                                                                                                                                                                                                                                                       | Onset of congestive heart failure symptoms. EF = 30%. <u>Cardiac Biopsy</u> : dystrophin staining showed reduced with rod domain antibody, irregular with amino- and carboxyl-terminal antibodies.                                                                                                                                                           | 38           | 2     |
| 192    | 45-47         | BMD, XLDCM | [12]            | Age at consultation: 32 years. CK = 2780U/L. Neurological examination: normal except for slight calf hypertrophy. Biopsy showed fiber size variation with scattered atrophic fibers and fiber hypertrophy, internalized nuclei, some necrotic fibers and fiber splitting, moderate increase of connective tissue. Western Blot: slight reduction in dystrophin size. Positive family history. | DCM diagnosis. ECG showed LBBB. Marked dilation of LV. LVEDd = 44mm, LVEDV = 201ml, EF = 17%, moderate regurgitation, thrombus in the apical region of the LV chamber. <u>Cardiac Biopsy</u> : hypertrophic myocytes with huge and bizarre nuclei, focal interstitial fibrosis, mild endocardial fibrous thickening.<br><br>Heart transplantation at age 31. | 29           | 2     |
| MJ02   | 45-47         | BMD        | MDAc            | EMG at 7 years was normal but calf hypertrophy present. Onset of skeletal muscle symptoms: 22 years. Diagnosed at 32 years. Calf hypertrophy, progressive weakness and heaviness when climbing stairs. CK=1200U/L. Positive family history.                                                                                                                                                   | EF = 30%.<br><br>Family: Grandfather died of DCM.                                                                                                                                                                                                                                                                                                            | 34           | 2     |

| ID   | Deleted Exons | Dx    | Source           | Clinical information                                                                                                                                                                                                                                                                                                                                                                  | Cardiac information                                                                                                                                                                                                                   | Age* (Years) | Group |
|------|---------------|-------|------------------|---------------------------------------------------------------------------------------------------------------------------------------------------------------------------------------------------------------------------------------------------------------------------------------------------------------------------------------------------------------------------------------|---------------------------------------------------------------------------------------------------------------------------------------------------------------------------------------------------------------------------------------|--------------|-------|
| MJ20 | 45-47         | BMD   | MDAc             | Onset of skeletal muscle symptoms: 10years. Diagnosed at 11years. Symptom of weakness. CK = 1245 U/L. Started cane use at age 19 and wheelchair at 23. Partially ambulatory. Biopsy showed marked variability in muscle fiber size, 10-120 µm. Positive family history.                                                                                                               | Cardiac data at 19 years of age: DCM diagnosis. Cardiac medications started.<br><br>Cardiac data at 35 years of age: EF = 55%.                                                                                                        | 19           | 2     |
| AH05 | 45-47         | BMD   | MDAc             | Onset of skeletal muscle symptoms: 5 years. Could not keep up with peers in terms of running. Diagnosis: 18 years. Difficulty climbing stairs and getting up from the floor, calf hypertrophy. CK = 2516 U/L. Biopsy showed fiber size variation (10-125 micrometers in diameter), marked connective tissue proliferation. Wheelchair dependent by 42 years. Negative family history. | Normal ECG. EF = 51%. SF = 32%.                                                                                                                                                                                                       | 39           | 2     |
| 228  | 45-47         | BMD   | [13]             | Unavailable.                                                                                                                                                                                                                                                                                                                                                                          | EF = 42%, LVEDd = 58mm. Diagnosis of DCM based on WHO criteria. Negative for cardiac insufficiency based on European Society of Cardiology criteria.                                                                                  | 37           | 2     |
| 198  | 45-48         | XLDCM | [7] (Patient 6)  | CK = 501U/L. Negative family history.                                                                                                                                                                                                                                                                                                                                                 | Onset of cardiac symptoms. EF = 18%. DCM diagnosis. <i>Cardiac Biopsy</i> : reduced dystrophin immunoreactivity with antibodies to the rod domain and irregular staining with antibodies to the amino- and carboxyl-terminal regions. | 39           | 2     |
| 210  | 45-48         | XLDCM | [14] (Patient 2) | Age at consultation: 33 years. No skeletal muscle symptoms. CK = 754U/L. Positive family history.                                                                                                                                                                                                                                                                                     | DCM diagnosis pre-dating cardiac data below.<br><br>Cardiac data at 33 years of age: ECG showed LBBB. Interventricular septal thickness = 8mm; Posterior wall thickness = 8mm; LVEDd = 67mm; LVEDs = 52mm; SF = 22%.                  | 33           | 2     |

| ID  | Deleted Exons | Dx    | Source              | Clinical information                                                                                                                                                                                  | Cardiac information                                                                                                                                                                                                                                                                                                                                                                       | Age* (Years) | Group |
|-----|---------------|-------|---------------------|-------------------------------------------------------------------------------------------------------------------------------------------------------------------------------------------------------|-------------------------------------------------------------------------------------------------------------------------------------------------------------------------------------------------------------------------------------------------------------------------------------------------------------------------------------------------------------------------------------------|--------------|-------|
| 212 | 45-48         | XLDCM | [14]<br>(Patient 4) | Age at consultation: 57 years. No skeletal muscle symptoms. CK = 438U/L. Positive family history.                                                                                                     | DCM diagnosis pre-dating cardiac data below.<br><br>Cardiac data at 57 years of age: ECG showed RBBB. Interventricular septal thickness = 9mm; Posterior wall thickness = 9mm; LVEDd = 65mm; LVEDs = 58mm; SF = 11%.                                                                                                                                                                      | 57           | 2     |
| 201 | 45-48         | BMD   | [15]                | Onset of skeletal muscle symptoms: 3 years. Age at consultation: 33 years.                                                                                                                            | SF = 11%; LVEDd = 82; Interventricular septal thickness = 18mm; Posterior wall thickness: 18.                                                                                                                                                                                                                                                                                             | 33           | 2     |
| 252 | 45-48         | BMD   | [8]                 | Age at consultation: 54 years.                                                                                                                                                                        | LVEDd = 67mm, EF = 30%, met DCM criteria of WHO. Symptoms: dyspnoea, thoracic pain.                                                                                                                                                                                                                                                                                                       | 54           | 2     |
| 109 | 45-48         | BMD   | [9]<br>(Patient 13) | Age at consultation: 15 years. Clinical Severity: mild. Biopsy showed few dystrophin negative fibers. Western blot: reduced dystrophin expression (40%) and size (370 kDa). Negative family history.  | ECG showed incomplete RBBB. Normal Holter ECG. LA volume = 40 mL/m <sup>2</sup> . LV EDV = 69 mL/m <sup>2</sup> . EF = 51%. RVEDV = 84 mL/m <sup>2</sup> . RVEF = 63%. RV wall motion apical hypokinesia.                                                                                                                                                                                 | 15           | 2     |
| 112 | 45-48         | BMD   | [9]<br>(Patient 25) | Age at consultation: 30 years. Clinical Severity: Moderate. Biopsy showed small number of dystrophin negative fibers. Western Blot: reduced amount (40%) and size (370 kDa). Positive family history. | ECG showed incomplete RBBB. Holter ECG showed isolated monomorphic PVCs (Lown grade 1). LA volume = 29 mL/m <sup>2</sup> . LV EDV = 78 mL/m <sup>2</sup> . EF = 48%. LV wall motion: diffuse hypokinesia. RV EDV = 64 mL/m <sup>2</sup> . RVEF = 39%.                                                                                                                                     | 30           | 2     |
| 105 | 45-48         | BMD   | [9]<br>(Patient 30) | Age at consultation: 36 years. Clinical Severity: Mild. Western Blot: normal amount but reduced size (380 kDa). Positive family history.                                                              | Symptomatic. ECG showed LBBB. Holter ECG showed polymorphic ventricular arrhythmias (Lown grade 3). Positive infra-Hisian block (His-ventricular interval 80ms). Pacemaker implanted. LA volume = 45 mL/m <sup>2</sup> . LV EDV = 85 mL/m <sup>2</sup> . EF = 39%. LV wall motion: anterior septal akinesia. RV EDV = 69 mL/m <sup>2</sup> . RVEF = 65%. RV wall motion: septal akinesia. | 36           | 2     |



| ID    | Deleted Exons | Dx         | Source                | Clinical information                                                                                                                                                                                                                                                                                                                                                                                                                              | Cardiac information                                                                                                                                                                                                                                                                                                     | Age* (Years) | Group |
|-------|---------------|------------|-----------------------|---------------------------------------------------------------------------------------------------------------------------------------------------------------------------------------------------------------------------------------------------------------------------------------------------------------------------------------------------------------------------------------------------------------------------------------------------|-------------------------------------------------------------------------------------------------------------------------------------------------------------------------------------------------------------------------------------------------------------------------------------------------------------------------|--------------|-------|
| 182   | 45-48         | BMD        | [10]<br>(Patient A14) | Age at consultation: 20 years. Cramps, myalgia, myoglobinuria, calf hypertrophy. CK = 28 U/L. Western blot: reduced dystrophin amount (40%) and reduced size (370 kDa).                                                                                                                                                                                                                                                                           | ECG showed incomplete RBBB. Normal Holter ECG. LVEDV = 69 mL/m <sup>2</sup> . EF = 51%.                                                                                                                                                                                                                                 | 20           | 2     |
| 227   | 45-48         | BMD        | [13]                  | Unavailable.                                                                                                                                                                                                                                                                                                                                                                                                                                      | EF = 30%, LVEDd = 67mm. Diagnosed DCM based on WHO criteria. Diagnosed cardiac insufficiency based on European Society of Cardiology criteria.                                                                                                                                                                          | 54           | 2     |
| 195   | 45-48         | BMD, XLDCM | [7]<br>(Patient 3)    | CK=2203U/L. Negative family history.                                                                                                                                                                                                                                                                                                                                                                                                              | Onset of congestive heart failure symptoms. EF = 20%. <i>Cardiac Biopsy</i> : dystrophin staining reduced with rod domain antibody, irregular with amino- and carboxyl-terminal antibodies.                                                                                                                             | 29           | 2     |
| 144   | 45-48         | BMD        | [6]<br>(Patient 5)    | Age at consultation: 25 years. Major impairment of motor function but ambulant. FVC = 77%.                                                                                                                                                                                                                                                                                                                                                        | Normal ECG. QTc: 404ms. QT/PQ = 8.8. LVEDd = 47mm. SF = 27%.                                                                                                                                                                                                                                                            | 25           | 2     |
| SL49  | 45-48         | BMD        | UDP                   | Onset of skeletal muscle symptoms: 6.5 years. Diagnosed at 17 years. Myalgia, cramping. Vignos Scale (52 years): upper = 1 / lower = 2. Positive family history.                                                                                                                                                                                                                                                                                  | Cardiac data at 47 years of age: SF = 28%.<br><br>Cardiac data at 52 years of age: EF = 50%.                                                                                                                                                                                                                            | 47           | 2     |
| SL578 | 45-48         | BMD        | UDP                   | Onset of skeletal muscle symptoms: 29 years. Diagnosis: 35years. Symptom of weakness. Wheelchair dependent at 53 years. Vignos Scale (60 years): upper = 5 / lower = 8.                                                                                                                                                                                                                                                                           | EF = 47%.                                                                                                                                                                                                                                                                                                               | 56           | 2     |
| 161   | 45-48         | BMD, XLDCM | [16]<br>(Patient 1)   | Onset of skeletal muscle symptoms: 60 years. Difficulties in tilling the soil with a hoe and climbing hills and stairs. Age at consultation: 73 years. Neurological exam: moderate proximal muscular atrophy and weakness, waddling gait, mild calf hypertrophy, positive Gower's sign. Walks independently. Computed tomography scan: low-density areas in the proximal muscles, especially in the thighs. CK = 681U/L. Positive family history. | Diagnosis of congestive heart failure caused by DCM. Symptoms of paroxysmal chest discomfort and dyspnoea. Chest roentgenogram showed cardiomegaly and pulmonary congestion (cardiothoracic ratio = 61%). ECG showed prominent R wave in V1. EF = 27%, SF = 13.5%, positive LV hypokinesis, LVEDd = 66mm, LVEDs = 57mm. | 70           | 2     |

| ID    | Deleted Exons | Dx         | Source           | Clinical information                                                                                                                                                                                                                                                                                                                                                                                                                                                                                                                                                         | Cardiac information                                                                                                                                                                                                                                 | Age* (Years) | Group |
|-------|---------------|------------|------------------|------------------------------------------------------------------------------------------------------------------------------------------------------------------------------------------------------------------------------------------------------------------------------------------------------------------------------------------------------------------------------------------------------------------------------------------------------------------------------------------------------------------------------------------------------------------------------|-----------------------------------------------------------------------------------------------------------------------------------------------------------------------------------------------------------------------------------------------------|--------------|-------|
| 164   | 45-48         | BMD, XLDCM | [16] (Patient 4) | Onset of skeletal muscle symptoms: early 30's. Awkward gait. Started use of cane in his early 40's. Wheelchair dependent in his late 40s. Age at consultation: 53 years. Marked proximal muscular atrophy and weakness, no obvious hypertrophy in the calves. CK = 217U/L. Negative family history.                                                                                                                                                                                                                                                                          | DCM diagnosis. Chest roentgenogram showed cardiomegaly, bilateral pleural effusion and pulmonary congestion. ECG showed prominent Q wave in I, aVL, V5-6. LV hypokinesis, LVEDd = 64mm, LVEDs = 60mm. EF = 16%, SF = 6.3%.                          | 53           | 2     |
| SL699 | 45-48         | BMD        | UDP              | Onset of skeletal muscle symptoms: 10 years. Diagnosis: 22 years. Symptom of weakness. Wheelchair dependent at 48 years. Vignos Scale (48 years): upper = 2 / lower = 9.                                                                                                                                                                                                                                                                                                                                                                                                     | EF = 50%.                                                                                                                                                                                                                                           | 47           | 2     |
| SL8   | 45-48         | BMD        | UDP              | Onset of skeletal muscle symptoms: 2 years. Diagnosis: 23 years. Weakness, hypertrophy, myalgia/cramping, myoglobinuria, cognitive dysfunction. Vignos Scale (40 years): upper = 1 / lower = 5. Negative family history.                                                                                                                                                                                                                                                                                                                                                     | EF = 29%.                                                                                                                                                                                                                                           | 27           | 2     |
| SL42  | 45-49         | BMD        | UDP              | Onset of skeletal muscle symptoms: 6 years. Diagnosis: 7 years. Symptom of weakness. Wheelchair dependent at 23 years of age. Vignos Scale (32 years): upper = 2 / lower = 9. Negative family history.                                                                                                                                                                                                                                                                                                                                                                       | EF = 25%, SF = 14%.                                                                                                                                                                                                                                 | 32           | 2     |
| 224   | 45-49         | XLDCM, BMD | [17]             | Age at consultation: 23 years. No trouble in walking. Normal muscle mass except for pseudohypertrophy of calf and quadriceps muscles; normal muscle strength. Biopsy showed internal nuclei, mild variability in the fiber size with hypotrophic and hypertrophic fibers, rare splitting fibers in an otherwise well preserved muscle. Dystrophin staining: normal with rod domain antibodies, faint with N-terminal antibody, almost normal with few areas of discontinuity with C-terminal antibody. CK = 520U/L. Condition unchanged at 26 years of age. Brother of #225. | DCM diagnosis. Symptom of palpitations. Echocardiogram showed enlarged left ventricle. <i>Cardiac biopsy</i> on RV: mosaic pattern of negative and positive dystrophin cardiomyocytes. Faint staining with amino- and carboxyl-terminal antibodies. | 19           | 2     |

| ID   | Deleted Exons | Dx         | Source           | Clinical information                                                                                                                                                                                                                                                                                                                 | Cardiac information                                                                                                                                                                                              | Age* (Years) | Group |
|------|---------------|------------|------------------|--------------------------------------------------------------------------------------------------------------------------------------------------------------------------------------------------------------------------------------------------------------------------------------------------------------------------------------|------------------------------------------------------------------------------------------------------------------------------------------------------------------------------------------------------------------|--------------|-------|
| 225  | 45-49         | XLDCM, BMD | [17]             | Age: 6 years. Calf hypertrophy and elevated CK, no signs of muscle involvement. Brother of #224.                                                                                                                                                                                                                                     | DCM diagnosis at 23 years. Symptoms of dyspnea even with mild physical activity. EF = 28%, LVEDd = 72 mm.<br><br>Died of DCM at 29 years.                                                                        | 23           | 2     |
| 215  | 45-49         | BMD        | [9] (Patient 16) | Age at consultation: 16 years. Clinical Severity: mild. FVC = 109%. Western blot: reduced dystrophin expression (50%) and size (390 kDa). Negative family history.                                                                                                                                                                   | ECG showed incomplete RBBB. Holter ECG showed isolated monomorphic PVCs documented >30/hr (Lown grade 1). LA volume normal. LV EDV= 65 mL/m <sup>2</sup> . EF = 50%. RV EDV = 45 mL/m <sup>2</sup> . RVEF = 51%. | 16           | 2     |
| MJ14 | 45-49         | BMD        | MDAc             | Motor and cognitive delay. Classified as retarded at 33 years of age. Onset of skeletal muscle symptoms: 33 years. Frequent falling. Very mild muscle involvement. CK = 1700 U/L. Dystrophin staining shows correct localization at membrane in all fibers. Western Blot: reduced levels and size. Positive family history.          | EF = 22%, dilated LV, no mitral regurgitation.<br><br>Cardiac data at 37 years of age: Congestive heart failure. Chest X ray showed cardiomegaly.                                                                | 36           | 2     |
| SL48 | 45-49         | BMD        | UDP              | Onset of skeletal muscle symptoms: 6.5 years. Diagnosis: 6 years. Calf hypertrophy, myalgia, cramping. Vignos Scale (31 years): upper = 1 / lower = 2.                                                                                                                                                                               | EF = 40%.                                                                                                                                                                                                        | 28           | 2     |
| 147  | 46-49         | BMD        | [6] (Patient 11) | Age at consultation: 26 years. Minor impairment of motor function. FVC = 80%.                                                                                                                                                                                                                                                        | ECG showed LV hypertrophy. QTc: 430ms. QT/PQ = 10.00. LVEDd = 51mm. SF = 27%.                                                                                                                                    | 26           | 2     |
| 137  | 47            | BMD, XLDCM | [18] (Patient 4) | Onset of skeletal muscle symptoms: 2 years. Awkward gait, could not run as fast as his peers. Diagnosed with limb-girdle muscular dystrophy (incorrectly) and DCM at age 23 years. Age at consultation: 34 years. Clinical status: marked proximal muscular atrophy and weakness, decreased deep tendon reflexes, and waddling gait. | Cardiac data at 23 years of age: DCM diagnosis.<br><br>Cardiac data at 30 years of age: Occasional nocturnal orthopnea, exertional dyspnea, and hemoptysis due to left-sided heart failure.                      | 23           | 2     |

| ID  | Deleted Exons | Dx         | Source                             | Clinical information                                                                                                                                                                                                                                                                                                             | Cardiac information                                                                                                                                                                                                                                                            | Age* (Years) | Group |
|-----|---------------|------------|------------------------------------|----------------------------------------------------------------------------------------------------------------------------------------------------------------------------------------------------------------------------------------------------------------------------------------------------------------------------------|--------------------------------------------------------------------------------------------------------------------------------------------------------------------------------------------------------------------------------------------------------------------------------|--------------|-------|
| 69  | 47            | BMD, XLDCM | [18] (Patient 3); [19] (Patient 1) | Onset of skeletal muscle symptoms: 9 years. Positive family history.                                                                                                                                                                                                                                                             | DCM diagnosis. ECG showed infarct pattern of LV posterolateral wall.<br><br>Family: Affected uncle died of congestive heart failure at age 47 years.                                                                                                                           | 25           | 2     |
| 97  | 47-48         | BMD        | [20] (Patient 16)                  | Onset of skeletal muscle symptoms: 15years. Biopsy showed positive dystrophic change in skeletal muscle. Negative family history.                                                                                                                                                                                                | Cardiac failure diagnosis. Death in same year.                                                                                                                                                                                                                                 | 51           | 2     |
| 104 | 48            | BMD        | [9] (Patient 19)                   | Age at consultation: 20 years. Clinical Severity: Mild. CK= 2700 U/L. Western blot: normal dystrophin expression but reduced size (370 kDa). Positive family history.                                                                                                                                                            | Normal ECG. Holter ECG showed isolated monomorphic PVCs (Lown grade 1). Normal LA volume. LV EDV = 65 mL/m <sup>2</sup> . EF = 53%. RV EDV normal. RVEF normal.                                                                                                                | 20           | 2     |
| 152 | 48            | BMD        | [6] (Patient 19)                   | Age at consultation: 16 years. Minor impairment of motor function. FVC = 82%.                                                                                                                                                                                                                                                    | ECG showed RBBB, left ventricular hypertrophy, lateral Q wave. QTc: 403ms. QT/PQ = 9.30. LVEDd = 52mm. SF = 29%.                                                                                                                                                               | 16           | 2     |
| 194 | 48            | XLDCM      | [7] (Patient 2)                    | CK = 63U/L. Negative family history.                                                                                                                                                                                                                                                                                             | Onset of congestive heart failure symptoms and DCM diagnosis. EF = 14%. <u>Cardiac Biopsy</u> : reduced dystrophin immunoreactivity with an antibody to the rod domain, and irregular staining with antibodies to the amino- and carboxyl-terminal domains.                    | 24           | 2     |
| 190 | 48-49         | BMD        | [10] (Patient B28)                 | Age at consultation: 48 years. Cramps, myalgia, myoglobinuria, calf hypertrophy. CK = 4700 U/L. Western blot: reduced dystrophin amount (50%) and reduced size (390 kDa).                                                                                                                                                        | ECG showed LBBB. Holter ECG showed Lown grade 4b. LVEDV = 229 mL/m <sup>2</sup> . EF = 34%. LV wall motion: diffuse hypokinesia.                                                                                                                                               | 48           | 2     |
| 71  | 48-49         | XLDCM      | [21] (Patient 1)                   | Age at consultation: 24 years. Dyspnea with mild physical activity, no cramps or myalgia associated with exercise. Neurological exam: no weakness or muscle wasting or hypertrophy. CK = 540 -867 U/L. Biopsy showed variable intensity of immunoreactivity among fibers, overall fainter than control. Positive family history. | DCM diagnosis. ECG showed Q waves in the inferior and posterior leads, incomplete RBBB. Holter ECG showed sustained ventricular arrhythmias monitoring. LVEDd = 73 mm, EF = 27%. Angiography showed no coronary artery disease. <u>Cardiac biopsy</u> : no active myocarditis. | 24           | 2     |

| ID   | Deleted Exons | Dx         | Source           | Clinical information                                                                                                                                                                                                                                                                                                                                                                                              | Cardiac information                                                                                                                                                                                                                                                                                                                                                                                                                             | Age* (Years) | Group |
|------|---------------|------------|------------------|-------------------------------------------------------------------------------------------------------------------------------------------------------------------------------------------------------------------------------------------------------------------------------------------------------------------------------------------------------------------------------------------------------------------|-------------------------------------------------------------------------------------------------------------------------------------------------------------------------------------------------------------------------------------------------------------------------------------------------------------------------------------------------------------------------------------------------------------------------------------------------|--------------|-------|
| 226  | 48-49         | BMD, XLDCM | [22] (Patient 2) | Age at consultation: 29 years. Elevated CK. Biopsy showed mild variability of fiber size and moderate interstitial fibrosis; dystrophin staining normal with carboxyl-terminal antibodies. Positive family history.                                                                                                                                                                                               | Cardiac data at 29 years of age: Cardiac symptoms of dyspnea. NYHA II. Marked LV dilation; LVEDV = 176 mL/m <sup>2</sup> , EF = 26%. The patient was treated with high doses of captopril.<br><br>Cardiac data at 30 years of age: Severe LV dilation; LVEDV = 166 mL/m <sup>2</sup> , EF = 28%. <i>Cardiac Biopsy</i> : Positive but faint dystrophin immunofluorescence in all cardiomyocytes. Diffuse but faint over-expression of utrophin. | 29           | 2     |
| 153  | 48-49         | BMD, XLDCM | [23]             | Onset of skeletal muscle symptoms: 32 years. Biopsy showed increased variability of muscle fiber diameter, rounded and abnormally shaped fibers, internalized myonuclei, slightly proliferated endomysial connective and fat tissue. Dystrophin staining patchy and irregular; reduced size by Western blot (380 kDa). Sarcoglycans and dystroglycan normally expressed. Utrophin detected in some muscle fibers. | Cardiac data at 26 years of age: DCM diagnosis.<br><br>Cardiac data at 27 years of age: Cardiac transplant for end stage DCM.                                                                                                                                                                                                                                                                                                                   | 26           | 2     |
| AH11 | 48-49         | BMD        | MDAc             | Onset of skeletal muscle symptoms: 30 years. Age at consultation: 42 years. Muscle pain and weakness. No calf hypertrophy. Normal reflexes. Related to #MJ13. Positive family history.                                                                                                                                                                                                                            | DCM diagnosis. EF = 15%.<br><br>Family: Brother had heart attack at age of 47 years.                                                                                                                                                                                                                                                                                                                                                            | 42           | 2     |
| MJ13 | 48-49         | BMD        | MDAc             | Onset of skeletal muscle symptoms and diagnosis: 25 years. Chest pain, muscle weakness, fatigue climbing upstairs, calf hypertrophy. CK = 658 U/L. Related to #AH11. Positive family history.                                                                                                                                                                                                                     | Severe chest pain, without vital sign and rhythm changes. Negative stress test. EF = 54%. LV free wall thickness: 0.9cm.                                                                                                                                                                                                                                                                                                                        | 37           | 2     |
| 199  | 45-51         | BMD, XLDCM | [7] (Patient 7)  | CK=1442U/L. Positive family history.                                                                                                                                                                                                                                                                                                                                                                              | Onset of congestive heart failure symptoms. ECG: Q waves in V4-6. EF = 35%. <i>Cardiac Biopsy</i> : dystrophin staining reduced with rod domain antibody, irregular with amino- and carboxyl-terminal antibodies.                                                                                                                                                                                                                               | 43           | 3     |

| ID   | Deleted Exons | Dx    | Source              | Clinical information                                                                                                                                                                                                                                                                                                                                                                                                           | Cardiac information                                                                                                                                                                                                                                                                                                                                                                                                                                                                                                 | Age* (Years) | Group |
|------|---------------|-------|---------------------|--------------------------------------------------------------------------------------------------------------------------------------------------------------------------------------------------------------------------------------------------------------------------------------------------------------------------------------------------------------------------------------------------------------------------------|---------------------------------------------------------------------------------------------------------------------------------------------------------------------------------------------------------------------------------------------------------------------------------------------------------------------------------------------------------------------------------------------------------------------------------------------------------------------------------------------------------------------|--------------|-------|
| 63   | 45-53         | BMD   | [20]<br>(Patient 8) | Onset of skeletal muscle symptoms: 15years. Skeletal muscle fibrosis. Positive family history.                                                                                                                                                                                                                                                                                                                                 | Heart failure diagnosed.                                                                                                                                                                                                                                                                                                                                                                                                                                                                                            | 36           | 3     |
| 209  | 45-55         | XLDCM | [24]                | Age at consultation: 36 years. Normal neurological exam. CK = 1,347U/L.                                                                                                                                                                                                                                                                                                                                                        | DCM diagnosis. LV dilatation (LVEDd = 72mm), diffuse hypokinesia of the left ventricular wall motion, reduced cardiac output, EF = 16%. Chest roentgenogram showed slight cardiomegaly, bilateral pleural effusion, and pulmonary congestion. ECG showed sinus tachycardia, poor R-wave progression in leads V <sub>1</sub> -V <sub>3</sub> and flat T wave in leads I, aVL, V <sub>5</sub> and V <sub>6</sub> . <u>Cardiac biopsy</u> : myocyte degeneration, irregularly shaped nuclei and interstitial fibrosis. | 36           | 3     |
| 248  | 45-55         | BMD   | [25]<br>(Patient 3) | Onset of skeletal muscle symptoms: 59 years. Mild limb muscle weakness. Age of BMD diagnosis: 69 years. Moderate proximal muscular atrophy, weakness, waddling gait, no calf pseudo hypertrophy. Clinical severity: moderate. Age at consultation: 76 years. Neurological examination: walking requires effort, muscular atrophy had slightly progressed. Clinical severity: moderate. CK = 669 IU/L. Negative family history. | First cardiac consultation at 69 years of age: ECG showed prominent R waves in V <sub>1</sub> . No LV hypokinesia. EF = 60%, SF = 32.1%, LVEDd = 56mm.<br><br>Second cardiac consultation at 76 years of age: ECG showed prominent R waves in V <sub>1</sub> , slight LV hypokinesia. EF = 56%, SF = 28.9%, LVEDd = 44mm.                                                                                                                                                                                           | 76           | 3     |
| MJ06 | 45-55         | BMD   | MDAc                | Diagnosis: 58 years. Positive family history.                                                                                                                                                                                                                                                                                                                                                                                  | Cardiac data at 63 years of age: EF = 15-20%, severe mitral regurgitation.<br><br>Cardiac data at 64 years of age: ECG showed ventricular tachycardia, widened QRS complex with duration about 128msec and frequent PVCs. LV and LA enlargement.                                                                                                                                                                                                                                                                    | 63           | 3     |

| ID  | Deleted Exons | Dx    | Source              | Clinical information                                                                                                                                                                                                                                                                                                                                                                                                                                                                                    | Cardiac information                                                                                                                                                                                                                                                                                                                                                               | Age* (Years) | Group |
|-----|---------------|-------|---------------------|---------------------------------------------------------------------------------------------------------------------------------------------------------------------------------------------------------------------------------------------------------------------------------------------------------------------------------------------------------------------------------------------------------------------------------------------------------------------------------------------------------|-----------------------------------------------------------------------------------------------------------------------------------------------------------------------------------------------------------------------------------------------------------------------------------------------------------------------------------------------------------------------------------|--------------|-------|
| 196 | 48-51         | XLDCM | [7]<br>(Patient 4)  | CK = 442-515U/L. Negative family history.                                                                                                                                                                                                                                                                                                                                                                                                                                                               | Onset of cardiac symptoms. Congestive heart failure diagnosed. EF = 30%.<br><i>Cardiac Biopsy</i> : reduced dystrophin immunoreactivity with an antibody to the rod domain, and irregular staining with antibodies to the amino- and carboxyl-terminal domains.                                                                                                                   | 30           | 3     |
| 203 | 48-51         | XLDCM | [26]                | Age at consultation: 65 years. Investigated following incidental finding of elevated CK in his 5-year-old grandson. Normal muscle strength, no trophic changes. Normal CK. Normal EMG. Biopsy was normal apart from occasional small fibers and some internal nuclei. Dystrophin immunostaining: normal in distribution, slightly reduced in amount. Western blot: reduced size of dystrophin. Alpha-sarcoglycan, beta-sarcoglycan, gamma-sarcoglycan, spectrin and merosin showed normal distribution. | Cardiac data at 60 years of age: DCM diagnosis. Severe LV dilation with reduced EF and mitral and aortic regurgitation. Coronary arteriography showed very mild atherosclerosis without significant obstructive lesions.<br><br>Died suddenly of cardiac arrest at age 68.<br><br>Family: "Cardiomyopathy" caused the death of his mother and two brothers in their sixth decade. | 60           | 3     |
| 211 | 48-52         | XLDCM | [14]<br>(Patient 3) | Age at consultation: 43 years. No skeletal muscle symptoms. CK = 96U/L. Positive family history.                                                                                                                                                                                                                                                                                                                                                                                                        | DCM diagnosis pre-dating cardiac data below.<br><br>Cardiac data at 43 years of age: ECG showed LBBB. Interventricular septal thickness = 9mm; Posterior wall thickness = 9mm; LVEDd = 72mm; LVEDs = 69mm; SF = 4%.                                                                                                                                                               | 43           | 3     |
| 200 | 48-53         | XLDCM | [7]<br>(Patient 8)  | CK below 200U/L. Negative family history.                                                                                                                                                                                                                                                                                                                                                                                                                                                               | Onset of cardiac symptoms. Congestive heart failure diagnosed. EF = 30%.<br><i>Cardiac Biopsy</i> : reduced dystrophin immunoreactivity with an antibody to the rod domain, and irregular staining with antibodies to the amino- and carboxyl-terminal domains.                                                                                                                   | 50           | 3     |

| ID   | Deleted Exons | Dx    | Source              | Clinical information                                                                                                                                                                       | Cardiac information                                                                                                                                                                                                                                                                                                                                                                                                                                                                                                                                                                                                                                                            | Age* (Years) | Group |
|------|---------------|-------|---------------------|--------------------------------------------------------------------------------------------------------------------------------------------------------------------------------------------|--------------------------------------------------------------------------------------------------------------------------------------------------------------------------------------------------------------------------------------------------------------------------------------------------------------------------------------------------------------------------------------------------------------------------------------------------------------------------------------------------------------------------------------------------------------------------------------------------------------------------------------------------------------------------------|--------------|-------|
| 208  | 49-51         | XLDCM | [21]<br>(Patient 2) | Age at consultation: 52 years. No muscle atrophy or pseudohypertrophy, normal muscle strength. CK= 84 U/L.                                                                                 | Cardiac data at 50 years of age: Onset of congestive heart failure symptoms.<br><br>Cardiac data at 52 years of age: Dyspnoeic at rest, systolic murmur present. ECG showed negative T waves in leads V5-V6. Dilated LV (LVEDd = 70mm), EF = 20%, dilated RV and both atria. Moderate mitral and tricuspidal valve regurgitation. <i>Cardiac biopsy</i> : significant fibrosis, separating individual cardiomyocytes in some areas, gross variability of fiber size mainly due to hypertrophic cardiomyocytes; strong and continuous dystrophin staining with antibodies to amino-terminus, mid rod domain, and carboxyl-terminus. Slight reduction in amount by Western blot. | 50           | 3     |
| MJ01 | 51-52         | BMD   | MDAc                | Onset of skeletal muscle symptoms: birth. Diagnosis: 5 years. Clinical findings: scoliosis since the teenage years, limited mobility at 29 years. Wheelchair dependent at 40 years of age. | Cardiac data at 33 years of age: Congestive heart failure. Pacemaker implanted.<br><br>Cardiac data at 35 years of age: Severe LV dilation with global LV dysfunction, EF = 34%.                                                                                                                                                                                                                                                                                                                                                                                                                                                                                               | 33           | 3     |

\* Age refers to the youngest age in years at which the patient fulfills our criteria for classification as affected with cardiomyopathy.

#### Abbreviations:

**AV**: atrioventricular; **BMD**: Becker muscular dystrophy; **CK**: creatine kinase; **DCM**: dilated cardiomyopathy; **Dx**: diagnosis; **ECG**: electrocardiogram; **EDV**: end diastole volume; **EF**: ejection fraction (left ventricular unless otherwise specified); **EPSS**: E-point septal separation; **FVC**: forced vital capacity; **LA**: left atrium; **LBBB**: left branch bundle block; **LV**: left ventricle; **LVEDd**: left ventricular end-diastolic diameter; **LVEDs**: left ventricular end systolic diameter; **MDAc**: muscular dystrophy clinics of Nationwide Children's Hospital and The Ohio State University Medical Center; **NSI**: no specific information; **PVC**: premature ventricular contraction; **RA**: right atrium;



**RBBB**: right branch bundle block; **RV**: right ventricle; **SF**: shortening fraction; **UDP**: United Dystrophinopathy Project; **WHO**: World Health Organization.

Normal values for measured parameters:

**CK**: 200 U/L (unless otherwise stated); **EF**: above or equal to 55%; **EPSS**: below 5 mm; **FVC**: 80%-120% predicted; **Intraventricular Septal Thickness**: below 12mm; **LVEDd**: below 58 mm, 2 z scores, or 2 SD; **Posterior Wall Thickness**: below 12mm; **QTc**: below 440ms; **SF**: above or equal to 32%; **Vignos Scale**: described in *JAMA* (1963), 184:89-96.

Published Sources:

1. Gold R, Kress W, Meurers B, Meng G, Reichmann H, Muller CR: Becker muscular dystrophy: detection of unusual disease courses by combined approach to dystrophin analysis. *Muscle Nerve* 1992, 15:214-218.
2. Feng J, Yan J, Buzin CH, Towbin JA, Sommer SS: Mutations in the dystrophin gene are associated with sporadic dilated cardiomyopathy. *Mol Genet Metab* 2002, 77:119-126.
3. Novakovic I, Bojic D, Todorovic S, Apostolski S, Lukovic L, Stefanovic D, Milasin J: Proximal dystrophin gene deletions and protein alterations in becker muscular dystrophy. *Ann N Y Acad Sci* 2005, 1048:406-410.
4. Oldfors A, Eriksson BO, Kyllerman M, Martinsson T, Wahlstrom J: Dilated cardiomyopathy and the dystrophin gene: an illustrated review. *Br Heart J* 1994, 72:344-348.
5. Maeda M, Nakao S, Miyazato H, Setoguchi M, Arima S, Higuchi I, Osame M, Taira A, Nomoto K, Toda H, et al.: Cardiac dystrophin abnormalities in Becker muscular dystrophy assessed by endomyocardial biopsy. *Am Heart J* 1995, 129:702-707.
6. Steare SE, Dubowitz V, Benatar A: Subclinical cardiomyopathy in Becker muscular dystrophy. *Br Heart J* 1992, 68:304-308.
7. Arbustini E, Diegoli M, Morbini P, Dal Bello B, Banchieri N, Pilotto A, Magani F, Grasso M, Narula J, Gavazzi A, et al.: Prevalence and characteristics of dystrophin defects in adult male patients with dilated cardiomyopathy. *J Am Coll Cardiol* 2000, 35:1760-1768.
8. Martins E, Silva-Cardoso J, Silveira F, Nadais G, Goncalves FR: Left ventricular function in adults with muscular dystrophies: genotype-phenotype correlations. *Rev Port Cardiol* 2005, 24:23-35.

9. Melacini P, Fanin M, Danieli GA, Fasoli G, Villanova C, Angelini C, Vitiello L, Miorelli M, Buja GF, Mostacciuolo ML, et al.: Cardiac involvement in Becker muscular dystrophy. *J Am Coll Cardiol* 1993, 22:1927-1934.
10. Melacini P, Fanin M, Danieli GA, Villanova C, Martinello F, Miorin M, Freda MP, Miorelli M, Mostacciuolo ML, Fasoli G, et al.: Myocardial involvement is very frequent among patients affected with subclinical Becker's muscular dystrophy. *Circulation* 1996, 94:3168-3175.
11. Akdemir R, Ozhan H, Gunduz H, Yazici M, Erbilen E, Uyan C, Imirzalioglu N: Complete atrioventricular block in Becker muscular dystrophy. *N Z Med J* 2004, 117:U895.
12. Piccolo G, Azan G, Tonin P, Arbustini E, Gavazzi A, Banfi P, Mora M, Morandi L, Tedeschi S: Dilated cardiomyopathy requiring cardiac transplantation as initial manifestation of Xp21 Becker type muscular dystrophy. *Neuromuscul Disord* 1994, 4:143-146.
13. Sousa RC, Silva P, Pais F, Fortuna A, Relvas S, Simoes L, Miranda O, Gama V: [Dilated cardiomyopathy in a patient with Becker's muscular dystrophy. A clinical case report]. *Rev Port Cardiol* 1993, 12:563-570, 511.
14. Shimizu M, Ino H, Yasuda T, Fujino N, Uchiyama K, Mabuchi T, Konno T, Kaneda T, Fujita T, Masuta E, et al.: Gene mutations in adult Japanese patients with dilated cardiomyopathy. *Circ J* 2005, 69:150-153.
15. Finsterer J, Stollberger C, Blazek G, Kunafer M, Prager E: Cardiac involvement over 10 years in myotonic and Becker muscular dystrophy and mitochondrial disorder. *Int J Cardiol* 2007, 119:176-184.
16. Yazaki M, Yoshida K, Nakamura A, Koyama J, Nanba T, Ohori N, Ikeda S: Clinical characteristics of aged Becker muscular dystrophy patients with onset after 30 years. *Eur Neurol* 1999, 42:145-149.
17. Politano L, Passamano L, Petretta VR, Nigro V, Papparella S, Nigro G, Santangelo L, M.G.Esposito, Come LI, Nigro G: Familial Dilated Cardiomyopathy Associated with the Typical Dystrophin BMD Mutation: Report on Two Additional Cases. *Acta Myol* 1999:3329-3336.
18. Yoshida K, Ikeda S, Nakamura A, Kagoshima M, Takeda S, Shoji S, Yanagisawa N: Molecular analysis of the Duchenne muscular dystrophy gene in patients with Becker muscular dystrophy presenting with dilated cardiomyopathy. *Muscle Nerve* 1993, 16:1161-1166.
19. Yazawa M, Ikeda S, Owa M, Haruta S, Yanagisawa N, Tanaka E, Watanabe M: A family of Becker's progressive muscular dystrophy with severe cardiomyopathy. *Eur Neurol* 1987, 27:13-19.

20. Saito M, Kawai H, Akaike M, Adachi K, Nishida Y, Saito S: Cardiac dysfunction with Becker muscular dystrophy. *Am Heart J* 1996, 132:642-647.
21. Muntoni F, Di Lenarda A, Porcu M, Sinagra G, Mateddu A, Marrosu G, Ferlini A, Cau M, Milasin J, Melis MA, et al.: Dystrophin gene abnormalities in two patients with idiopathic dilated cardiomyopathy. *Heart* 1997, 78:608-612.
22. Fanin M, Melacini P, Angelini C, Danieli GA: Could utrophin rescue the myocardium of patients with dystrophin gene mutations? *J Mol Cell Cardiol* 1999, 31:1501-1508.
23. Finsterer J, Bittner RE, Grimm M: Cardiac involvement in Becker's muscular dystrophy, necessitating heart transplantation, 6 years before apparent skeletal muscle involvement. *Neuromuscul Disord* 1999, 9:598-600.
24. Tasaki N, Yoshida K, Haruta SI, Kouno H, Ichinose H, Fujimoto Y, Urasawa N, Kawakami T, Taniguchi M, Kurushima S, et al.: X-linked dilated cardiomyopathy with a large hot-spot deletion in the dystrophin gene. *Intern Med* 2001, 40:1215-1221.
25. Nakamura A, Yoshida K, Fukushima K, Ueda H, Urasawa N, Koyama J, Yazaki Y, Yazaki M, Sakai T, Haruta S, et al.: Follow-up of three patients with a large in-frame deletion of exons 45-55 in the Duchenne muscular dystrophy (DMD) gene. *J Clin Neurosci* 2008, 15:757-763.
26. Palmucci L, Mongini T, Chiado-Piat L, Doriguzzi C, Fubini A: Dystrophinopathy expressing as either cardiomyopathy or Becker dystrophy in the same family. *Neurology* 2000, 54:529-530.

**Supplemental Table 3: Non-affected patients.**

| ID    | Deleted Exons | Dx  | Source              | Clinical information                                                                                                                                                                                                                                                                                                | Cardiac information                                                                                                                                                                                      | Age* (Years) | Group |
|-------|---------------|-----|---------------------|---------------------------------------------------------------------------------------------------------------------------------------------------------------------------------------------------------------------------------------------------------------------------------------------------------------------|----------------------------------------------------------------------------------------------------------------------------------------------------------------------------------------------------------|--------------|-------|
| 216   | 3-4           | BMD | [1]<br>(Patient 22) | Age at consultation: 24 years. Clinical Severity: severe. Myoglobinuria. FVC = 92%. Positive family history.                                                                                                                                                                                                        | ECG showed incomplete RBBB. Holter ECG showed isolated monomorphic PVCs (Low grade 1). Normal LA volume. LV EDV = 50 mL/m <sup>2</sup> . EF = 67%. Normal LV wall motion. Normal RV EDV. Normal RVEF.    | 24           | 1     |
| 218   | 3-4           | BMD | [1]<br>(Patient 29) | Age at consultation: 35 years. Clinical Severity: Severe. FVC = 75% (mild restrictive respiratory insufficiency). Positive family history.                                                                                                                                                                          | Normal ECG. Holter ECG showed isolated monomorphic PVCs (Low grade 1). Normal LA volume. LV EDV = 62 mL/ m <sup>2</sup> . EF = 61%. Normal LV wall motion. Normal RV EDV. Normal RVEF. Normal RV motion. | 35           | 1     |
| AH15  | 3-4           | BMD | MDAc                | Ambulatory at 9 years of age.                                                                                                                                                                                                                                                                                       | EF = 55%, SF = 34%, EPSS = 5mm.                                                                                                                                                                          | 9            | 1     |
| SL459 | 3-7           | BMD | UDP                 | Vignos Scale (22 years): upper = 1 / lower = 2.                                                                                                                                                                                                                                                                     | EF = 55%                                                                                                                                                                                                 | 25           | 1     |
| 99    | 3-9           | BMD | [1]<br>(Patient 1)  | Age at consultation: 6 years. Clinical Severity: Mild. Skeletal muscle symptoms are present. CK = 1770 U/L. Western blot: reduced dystrophin expression (60%) and size (370 kDa). Negative family history.                                                                                                          | Normal ECG. Normal LA volume. LV EDV = 37 mL/ m <sup>2</sup> . EF = 60%. Normal LV wall motion. RV EDV=41 mL/ m <sup>2</sup> . RVEF = 68%. Normal RV wall motion.                                        | 6            | 1     |
| AH14  | 5             | BMD | MDAc                | Onset of skeletal muscle symptoms: 7 years. Age at consultation: 13 years. Clinical Severity: Mild. Skeletal muscle symptoms are present. Elevated CK. Biopsy: dystrophic changes; Dys2 staining positive but Dys 1 and Dys 3 severely reduced; Utrophin is upregulated. Western Blot: severely reduced dystrophin. | EF = 58%, SF = 31%, EPSS = 5mm, no mitral valve regurgitation, no sign of LV dilation.                                                                                                                   | 13           | 1     |

| ID    | Deleted Exons | Dx  | Source           | Clinical information                                                                                                                                                                                  | Cardiac information                                                                                                                                                                                                       | Age* (Years) | Group |
|-------|---------------|-----|------------------|-------------------------------------------------------------------------------------------------------------------------------------------------------------------------------------------------------|---------------------------------------------------------------------------------------------------------------------------------------------------------------------------------------------------------------------------|--------------|-------|
| AH02  | 5             | BMD | MDAc             | Onset of skeletal muscle symptoms: 10 years. Frequent falling, difficulty climbing stairs, calf hypertrophy, positive Gower's sign. CK = 7651 U/L. Negative family history.                           | LVEDd = 0.5sd, EF = 60%, SF = 40%.                                                                                                                                                                                        | 14           | 1     |
| SL188 | 45            | BMD | UDP              | Onset of skeletal muscle symptoms: 3 years. Diagnosis: 6 years. Weakness, calf hypertrophy and Gower's sign. Vignos Scale (14 years): upper = 1 / lower = 2.                                          | EF = 63%, SF = 35%.                                                                                                                                                                                                       | 15           | 2     |
| 213   | 45-47         | BMD | [1] (Patient 2)  | Age at consultation: 6 years. Clinical Severity: Mild. CK = 5000 U/L. FVC = 56% (moderate restrictive respiratory insufficiency).                                                                     | Normal ECG. Normal LA volume. LV EDV = 67 mL/ m <sup>2</sup> . EF = 64%. Normal LV wall motion. RV EDV = 46 mL/ m <sup>2</sup> . RVEF = 57%. Normal RV motion.                                                            | 6            | 2     |
| 217   | 45-47         | BMD | [1] (Patient 24) | Age at consultation: 28 years. Clinical Severity: Moderate.                                                                                                                                           | ECG showed T wave changes. Normal Holter ECG. Normal LA volume. LV EDV = 69 mL/ m <sup>2</sup> . EF = 55%. Normal LV wall motion. RV EDV = 66 mL/ m <sup>2</sup> . RVEF = 64%.                                            | 28           | 2     |
| 106   | 45-47         | BMD | [1] (Patient 28) | Age at consultation: 33 years. Clinical Severity: Moderate. Biopsy showed small number of dystrophin negative fibers. Western Blot: reduced amount (50%) and size (380 kDa). Positive family history. | Normal ECG. Holter ECG showed isolated monomorphic PVCs (Low grade 1). LA volume = 29 mL/ m <sup>2</sup> . LV EDV = 44 mL/ m <sup>2</sup> . EF = 55%. Normal LV wall motion. RV EDV = 52 mL/ m <sup>2</sup> . RVEF = 52%. | 33           | 2     |
| KJ03  | 45-47         | BMD | MDAc             | Onset of skeletal muscle symptoms: childhood. Diagnosis: 37 years. Age at consultation: 47 years. Patient is ambulant with wide-based gait with exaggerated lordosis and some waddle.                 | Echocardiography and stress test negative for cardiac dilation.                                                                                                                                                           | 45           | 2     |
| SL382 | 45-47         | BMD | UDP              | Onset of skeletal muscle symptoms: 1.5 years. Diagnosis: 9 years. Toe walking, myalgia, cramping. Vignos Scale (19 years): upper = 1 / lower = 1. Negative family history.                            | EF=57%, SF= 32%.                                                                                                                                                                                                          | 19           | 2     |

| ID    | Deleted Exons | Dx  | Source | Clinical information                                                                                                                                                                                                                                                                                                                                                                     | Cardiac information                             | Age* (Years) | Group |
|-------|---------------|-----|--------|------------------------------------------------------------------------------------------------------------------------------------------------------------------------------------------------------------------------------------------------------------------------------------------------------------------------------------------------------------------------------------------|-------------------------------------------------|--------------|-------|
| SL879 | 45-47         | BMD | UDP    | Vignos Scale (10 years): upper = 1 / lower = 1.                                                                                                                                                                                                                                                                                                                                          | SF = 36.1%                                      | 10           | 2     |
| MJ04  | 45-47         | BMD | MDAc   | Diagnosis: 10 years. Elevated CK. Onset of skeletal muscle symptoms: 12 years. Muscle fatigue, weakness, calf hypertrophy.                                                                                                                                                                                                                                                               | Echocardiography normal.                        | 17           | 2     |
| MJ09  | 45-47         | BMD | MDAc   | Diagnosis: age 4 years. Biopsy showed muscle fiber size variation and necrosis. Elevated CK. Negative family history.                                                                                                                                                                                                                                                                    | EF = 60%, SF = 42.5%.                           | 24           | 2     |
| AH07  | 45-47         | BMD | MDAc   | Onset of skeletal muscle symptoms: 5 years. Muscle fatigue, calf hypertrophy, and hip pain. CK=18137 U/L. Biopsy showed no inflammation, mild fatty replacement and mild fibrosis. Staining for dystrophin, sarcoglycans, beta-dystroglycan and laminin showed strong undisrupted sarcolemmal staining. Western Blot: several dystrophin bands of reduced size. Positive family history. | LVEDd = 0.9 sd, EPSS = 2mm, SF = 40%, EF = 60%. | 9            | 2     |
| AH03  | 45-47         | BMD | MDAc   | Onset of skeletal muscle symptoms: 6 years. CK = 5650 U/L. Mild calf hypertrophy, mild lordosis, kyphosis, scoliosis, toe walking, positive Gower's sign, weakness, chronic pulmonary disease, developmental motor delay. Positive family history.                                                                                                                                       | EF = 55%, SF = 33%.                             | 10           | 2     |
| AH10  | 45-48         | BMD | MDAc   | Diagnosis: 10 months of age. Onset of skeletal muscle symptoms: 8 years. Calf hypertrophy, muscle cramps. CK = 5 210 U/L. Positive family history.                                                                                                                                                                                                                                       | EF = 58%, SF = 32.23%.                          | 15           | 2     |
| SL50  | 45-48         | BMD | UDP    | Onset of skeletal muscle symptoms: 6 years. Diagnosis: 6 years. Symptoms: weakness, myalgias, cramping. Negative family history. Vignos Scale (18 years): upper = 1/ lower = 1.                                                                                                                                                                                                          | EF = 55%                                        | 18           | 2     |

| ID   | Deleted Exons | Dx  | Source               | Clinical information                                                                                                                                                                                                                                           | Cardiac information                                                                                                                                                                            | Age* (Years) | Group |
|------|---------------|-----|----------------------|----------------------------------------------------------------------------------------------------------------------------------------------------------------------------------------------------------------------------------------------------------------|------------------------------------------------------------------------------------------------------------------------------------------------------------------------------------------------|--------------|-------|
| 214  | 45-48         | BMD | [1]<br>(Patient 4)   | Age at consultation: 10 years. Clinical Severity: Mild. Myoglobinuria. CK = 7300 U/L. FVC = 69% (mild restrictive respiratory insufficiency). Positive family history.                                                                                         | ECG showed R/S>1. Normal Holter ECG. Normal LA volume. LV EDV = 50 mL/ m <sup>2</sup> . EF = 62%. Normal LV wall motion. RV EDV = 74 mL/ m <sup>2</sup> . RVEF = 43%. Normal RV motion.        | 10           | 2     |
| 181  | 45-48         | BMD | [2]<br>(Patient A13) | Age at consultation: 20 years. Cramps, myalgia, myoglobinuria, calf hypertrophy. CK = 1774 U/L. Western blot: normal dystrophin amount but reduced size (360 kDa).                                                                                             | ECG showed left anterior fascicular block. Normal Holter ECG. LV EDV = 72 mL/ m <sup>2</sup> . EF = 63%.                                                                                       | 20           | 2     |
| 207  | 45-48         | BMD | [3]                  | Onset of skeletal muscle symptoms: 15 years. Cramps. Age at consultation: 41 years. CK = 406 U/L. No muscle weakness or fatigability. Muscle hypertrophy of glutei and calf muscles. Negative family history.                                                  | ECG showed flat T waves. Slight motility reduction of the LV posterior wall and increased LV EDV. Normal LV end-diastolic pressure, EF = 58%.                                                  | 41           | 2     |
| MJ26 | 45-48         | BMD | MDAc                 | Shoulder girde weakness and difficulty running since early childhood. Neurological exam at 18 years: CK = 2500-3300 U/L. Biopsy: fiber size variation, atrophic fibers, mild to moderate increase of internal nuclei. Western Blot: reduced dystrophin amount. | LVEDd = 0.5sd, SF = 37%, EF = 58%, no mitral regurgitation.                                                                                                                                    | 29           | 2     |
| 219  | 45-49         | BMD | [1]<br>(Patient 31)  | Age at consultation: 50 years. Clinical Severity: Severe. FVC = 26% (severe restrictive respiratory insufficiency). Positive family history.                                                                                                                   | ECG showed incomplete LBBB. Holter ECG showed Lown grade 4b. Normal LA volume. LV EDV = 74 mL/ m <sup>2</sup> . EF = 55%. Normal LV wall motion. Normal RV EDV. Normal RVEF. Normal RV motion. | 50           | 2     |
| 103  | 48            | BMD | [1]<br>(Patient 10)  | Age at consultation: 13 years. Clinical Severity: Mild. Skeletal muscle symptoms are present. CK = 3910 U/L. Western blot: reduced dystrophin expression (80%) and size (390 kDa). Positive family history.                                                    | ECG showed T wave changes and R/S>1. Normal Holter ECG. Normal LA volume. LV EDV = 49 mL/ m <sup>2</sup> . EF = 58%. RV EDV = 55 mL/ m <sup>2</sup> . RVEF = 56%.                              | 13           | 2     |

| ID  | Deleted Exons | Dx  | Source                  | Clinical information                                                                                                                                                                                                                                                                                                                                        | Cardiac information                                                                                                                                                                                                                   | Age* (Years) | Group |
|-----|---------------|-----|-------------------------|-------------------------------------------------------------------------------------------------------------------------------------------------------------------------------------------------------------------------------------------------------------------------------------------------------------------------------------------------------------|---------------------------------------------------------------------------------------------------------------------------------------------------------------------------------------------------------------------------------------|--------------|-------|
| 184 | 48            | BMD | [2]<br>(Patient A17)    | Age at consultation: 24 years. Cramps, myalgia, myoglobinuria, calf hypertrophy. CK = 18 U/L. Western blot: reduced dystrophin amount (60%) and reduced size (395 kDa).                                                                                                                                                                                     | ECG showed R/S>1. Normal Holter ECG. LV EDV = 88 mL/ m <sup>2</sup> . EF = 56%.                                                                                                                                                       | 24           | 2     |
| 114 | 48            | BMD | [4]<br>(Patients 1 & 2) | Onset of skeletal muscle symptoms: 3 years. Patients are twins. Symptoms: cramps and myalgia during routine activity. Negative Gower's sign. EMG showed myopathic features. CK = 2655 U/L. Age at consultation: 9 years. Biopsy showed slight variability in fiber staining for dystrophin. Western blot: slightly decreased size. Negative family history. | Normal ECG. Normal echocardiography.                                                                                                                                                                                                  | 3            | 2     |
| 108 | 48-49         | BMD | [1]<br>(Patient 12)     | Age at consultation: 14 years. Clinical Severity: Mild. Skeletal muscle symptoms are present. FVC = 105%. Biopsy showed many dystrophin negative fibers. Western blot: reduced dystrophin expression (50%) and size (390 kDa). Positive family history.                                                                                                     | ECG showed incomplete RBBB. Holter ECG showed Lown grade 1. Normal LA volume. LV EDV = 77 mL/ m <sup>2</sup> . EF = 65%. Normal LV wall motion. RV EDV = 110 mL/ m <sup>2</sup> . RVEF = 56%. RV wall motion showed septal akinesia.  | 14           | 2     |
| 180 | 48-49         | BMD | [2]<br>(Patient A11)    | Age at consultation: 18 years. CK = 6427 U/L. Cramps, myalgia, myoglobinuria, calf hypertrophy. Western blot: reduced amount (50%) and size (390 kDa).                                                                                                                                                                                                      | ECG showed incomplete RBBB. Holter ECG showed isolated monomorphic PVCs (Lown grade 1). LV EDV = 86 mL/ m <sup>2</sup> . EF = 58%. Normal LV wall motion.                                                                             | 18           | 2     |
| 100 | 45-51         | BMD | [1]<br>(Patient 5)      | Age at consultation: 10 years. Clinical Severity: Mild. Skeletal muscle symptoms are present. CK = 1616 U/L. Western blot: normal dystrophin expression levels but reduced size (360 kDa). Negative family history.                                                                                                                                         | ECG showed R/S>1. Holter ECG showed isolated monomorphic PVCs (Lown grade 1). Normal LA volume. LV EDV = 63 mL/ m <sup>2</sup> . EF = 69%. Normal LV wall motion. RV EDV = 60 mL/ m <sup>2</sup> . RVEF = 68%. Normal RV wall motion. | 10           | 3     |



| ID     | Deleted Exons | Dx  | Source               | Clinical information                                                                                                                                                                                                                                                                                                                                                                                                                                                                                                                                                                                                 | Cardiac information                                                                                                                                                                 | Age* (Years) | Group |
|--------|---------------|-----|----------------------|----------------------------------------------------------------------------------------------------------------------------------------------------------------------------------------------------------------------------------------------------------------------------------------------------------------------------------------------------------------------------------------------------------------------------------------------------------------------------------------------------------------------------------------------------------------------------------------------------------------------|-------------------------------------------------------------------------------------------------------------------------------------------------------------------------------------|--------------|-------|
| SL1198 | 45-51         | BMD | UDP                  | Age of skeletal muscle symptom onset: 1 year. Diagnosis: 2 years. Skeletal muscle symptoms are present. Developmental delay. Vignos Scale (8 years): upper = 1/ lower = 1.                                                                                                                                                                                                                                                                                                                                                                                                                                           | SF = 38.6%                                                                                                                                                                          | 8            |       |
| SL54   | 45-51         | BMD | UDP                  | Age of skeletal muscle symptom onset: 4 years. Diagnosis: 11 years. Myalgia, cramping. Vignos Scale (13 years): upper = 1 / lower = 1. Positive family history.                                                                                                                                                                                                                                                                                                                                                                                                                                                      | EF = 65%, SF = 34%.                                                                                                                                                                 | 13           | 3     |
| 185    | 45-52         | BMD | [2]<br>(Patient A18) | Age at consultation: 29 years. Cramps, myalgia, myoglobinuria, calf hypertrophy. CK = 2100 U/L. Western blot: normal dystrophin amount but reduced size (360 kDa).                                                                                                                                                                                                                                                                                                                                                                                                                                                   | Normal ECG. LVEDV = 53 mL/ m <sup>2</sup> . EF = 61%.                                                                                                                               | 29           | 3     |
| 162    | 45-55         | BMD | [16]<br>(Patient 2)  | Onset of skeletal muscle symptoms: 59 years. Mild but progressive weakness affecting both arms and legs, difficulty climbing hills and stairs, difficulty lifting luggage and standing from a sitting or crouching position. Age at consultation: 69 years. Neurological exam: moderate proximal muscular atrophy and weakness, especially in the lower limbs, positive Gower's sign, waddling gait, no calf hypertrophy. CK = 669 U/L. Biopsy showed fiber size variation, opaque fibers and proliferated connective tissues. Dystrophin staining: faint and discontinuous patchy pattern. Negative family history. | No cardiac symptoms. Negative cardiac failure, cardiomegaly on chest X-ray. ECG showed prominent R wave in V1. No LV hypokinesis, LVEDd = 56mm, LVEDs = 38mm. EF = 60%, SF = 32.1%. | 69           | 3     |

| ID    | Deleted Exons | Dx  | Source              | Clinical information                                                                                                                                                                                                                                                                                                                                                 | Cardiac information                                                                                                                                                                                                                                       | Age* (Years) | Group |
|-------|---------------|-----|---------------------|----------------------------------------------------------------------------------------------------------------------------------------------------------------------------------------------------------------------------------------------------------------------------------------------------------------------------------------------------------------------|-----------------------------------------------------------------------------------------------------------------------------------------------------------------------------------------------------------------------------------------------------------|--------------|-------|
| 178   | 45-55         | BMD | [2]<br>(Patient A5) | Age at consultation: 12 years. Clinical Severity: Mild. Cramps, myalgia, myoglobinuria, calf hypertrophy. CK = 6000 U/L. FVC normal. Western blot: reduced dystrophin amount (40%) and reduced size (340 kDa). Negative family history.                                                                                                                              | ECG showed R/S>1 and incomplete LBBB. Holter ECG showed isolated monomorphic PVCs (Lown grade 1). Normal LA volume. LV EDV = 50 mL/ m <sup>2</sup> . EF = 61%. Normal LV wall motion. RV EDV = 63 mL/ m <sup>2</sup> . RVEF = 60%. Normal RV wall motion. | 12           | 3     |
| 204   | 48-51         | BMD | [5]                 | Onset of skeletal muscle symptoms: 5 years. Age at consultation: 9 years. Calf hypertrophy and mild proximal muscle weakness. CK = 3,000 U/L. Grandson of #203.                                                                                                                                                                                                      | Normal echocardiography.                                                                                                                                                                                                                                  | 9            | 3     |
| AH08  | 49-51         | BMD | MDAc                | Onset of skeletal muscle symptoms and diagnosis: 4 years. CK = 551 U/L. Normal pulmonary function. Brother of #AH9. Positive family history.                                                                                                                                                                                                                         | SF = 37%, EF = 59%, LVEDd = 1sd.                                                                                                                                                                                                                          | 5            | 3     |
| AH09  | 49-51         | BMD | MDAc                | Onset of skeletal muscle symptoms: 7 years. Weakness and muscle pain. CK = 1096 U/L. Brother of #AH8. Positive family history.                                                                                                                                                                                                                                       | SF = 42%, EF = 62%, no mitral regurgitation.                                                                                                                                                                                                              | 8            | 3     |
| 202   | 50-51         | BMD | [6]                 | Onset of skeletal muscle symptoms: 2 years. Age at consultation: 4 years. CK = 1300 U/L. Normal EMG. Biopsy showed rhabdomyolysis without features of muscular dystrophy. Immunolabelling for dystrophin, merosin and dysferlin were normal. Western blot: reduced size of dystrophin and slightly reduced amount of dystrophin, $\alpha$ and $\gamma$ -sarcoglycan. | Normal echocardiography.                                                                                                                                                                                                                                  | 4            | 3     |
| SL896 | 50-53         | BMD | UDP                 | Onset of skeletal muscle symptoms: 5years. Diagnosis: 6.5 years. Symptom of weakness. Vignos Scale (13 years): upper = 1 / lower = 1. Positive family history.                                                                                                                                                                                                       | SF = 39%.                                                                                                                                                                                                                                                 | 4            | 3     |

\* Age refers to the age in years of the patient at the last reported cardiac evaluation with cardiac findings that fulfill our criteria for a classification of non-affected with cardiomyopathy.

Abbreviations:

**BMD:** Becker muscular dystrophy; **CK:** creatine kinase; **Dx:** diagnosis; **ECG:** electrocardiogram; **EDV:** end diastole volume; **EF:** ejection fraction (left ventricular unless otherwise specified); **EMG:** electromyography; **EPSS:** E-point septal separation; **FVC:** forced vital capacity; **LA:** left atrium; **LBBB:** left branch bundle block; **LV:** left ventricle; **LVEDd:** left ventricular end-diastolic diameter; **MDAc:** muscular dystrophy clinics of Nationwide Children's Hospital and The Ohio State University Medical Center; **PVC:** premature ventricular contraction; **RBBB:** right branch bundle block; **RV:** right ventricle; **SF:** shortening fraction; **UDP:** United Dystrophinopathy Project.

Normal values for measured parameters:

**CK:** 200 U/L (unless otherwise stated); **EF:** above or equal to 55%; **EPSS:** below 5 mm; **FVC:** 80%-120% predicted; **LVEDd:** below 58 mm, 2 z scores, or 2 SD; **SF:** above or equal to 32%; **Vignos Scale:** described in *JAMA* (1963), 184:89-96.

Published sources:

1. Melacini P, Fanin M, Danieli GA, Fasoli G, Villanova C, Angelini C, Vitiello L, Miorelli M, Buja GF, Mostacciuolo ML, et al.: Cardiac involvement in Becker muscular dystrophy. *J Am Coll Cardiol* 1993, 22:1927-1934.
2. Melacini P, Fanin M, Danieli GA, Villanova C, Martinello F, Miorin M, Freda MP, Miorelli M, Mostacciuolo ML, Fasoli G, et al.: Myocardial involvement is very frequent among patients affected with subclinical Becker's muscular dystrophy. *Circulation* 1996, 94:3168-3175.
3. Siciliano G, Fanin M, Angelini C, Pollina LE, Miorin M, Saad FA, Freda MP, Muratorio A: Prevalent cardiac involvement in dystrophin Becker type mutation. *Neuromuscul Disord* 1994, 4:381-386.
4. Ramelli GP, Joncourt F, Luetschg J, Weis J, Tolnay M, Burgunder JM: Becker muscular dystrophy with marked divergence between clinical and molecular genetic findings: case series. *Swiss Med Wkly* 2006, 136:189-193.
5. Palmucci L, Mongini T, Chiado-Piat L, Doriguzzi C, Fubini A: Dystrophinopathy expressing as either cardiomyopathy or Becker dystrophy in the same family. *Neurology* 2000, 54:529-530.

6. Lesca G, Testard H, Streichenberger N, Pelissier JF, Lestra C, Burel E, Jonveaux P, Michel-Calemard L: [Family study allows more optimistic prognosis and genetic counselling in a child with a deletion of exons 50-51 of the dystrophin gene]. *Arch Pediatr* 2007, 14:262-265.

### Dystrophin

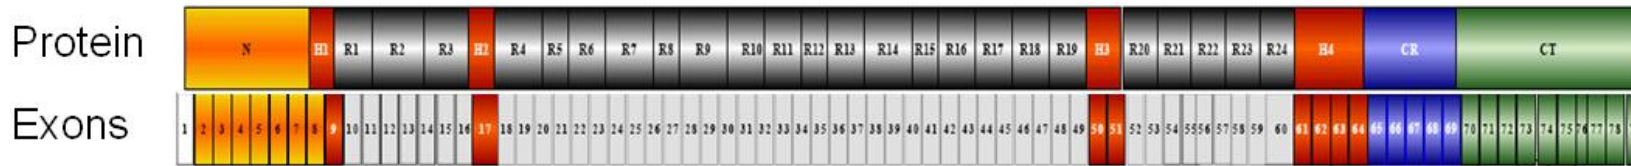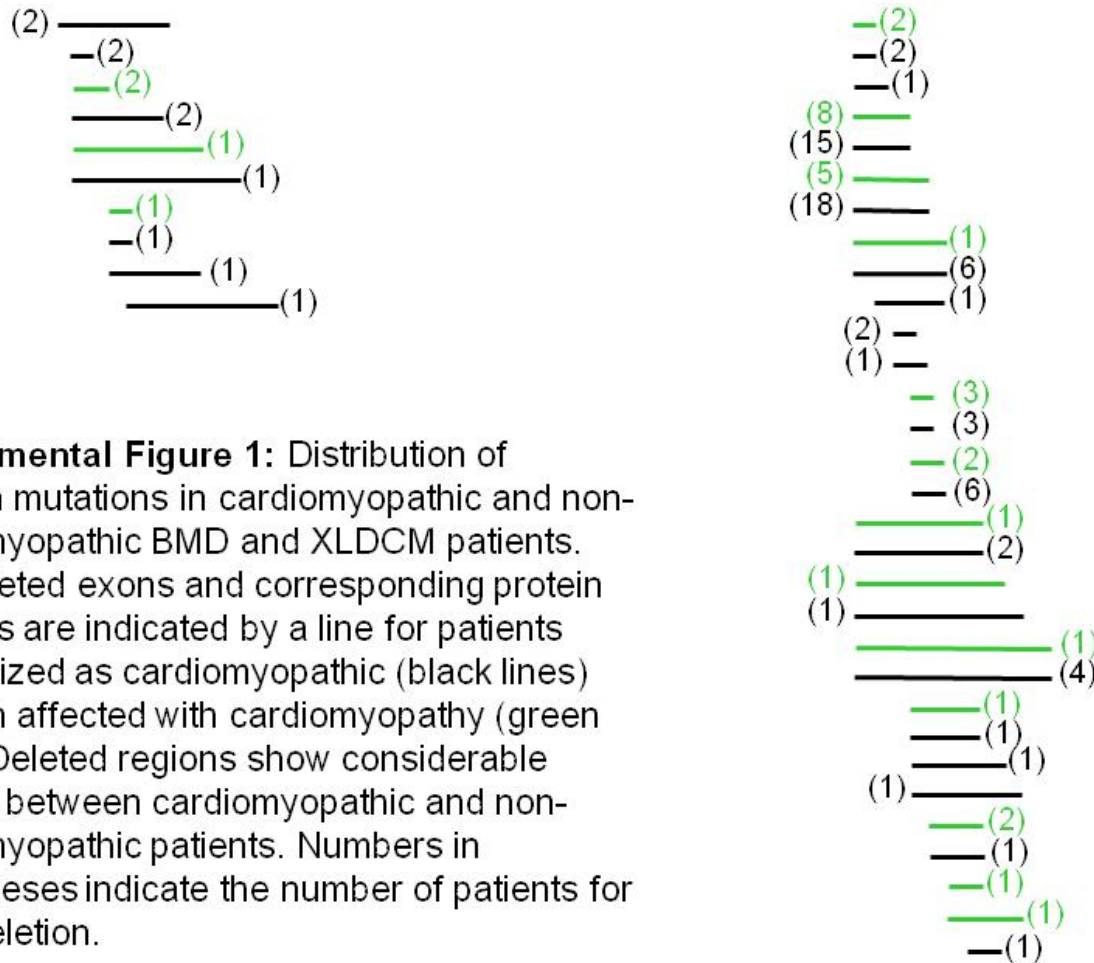

**Supplemental Figure 1:** Distribution of deletion mutations in cardiomyopathic and non-cardiomyopathic BMD and XLDCM patients. The deleted exons and corresponding protein domains are indicated by a line for patients categorized as cardiomyopathic (black lines) and non affected with cardiomyopathy (green lines). Deleted regions show considerable overlap between cardiomyopathic and non-cardiomyopathic patients. Numbers in parentheses indicate the number of patients for each deletion.

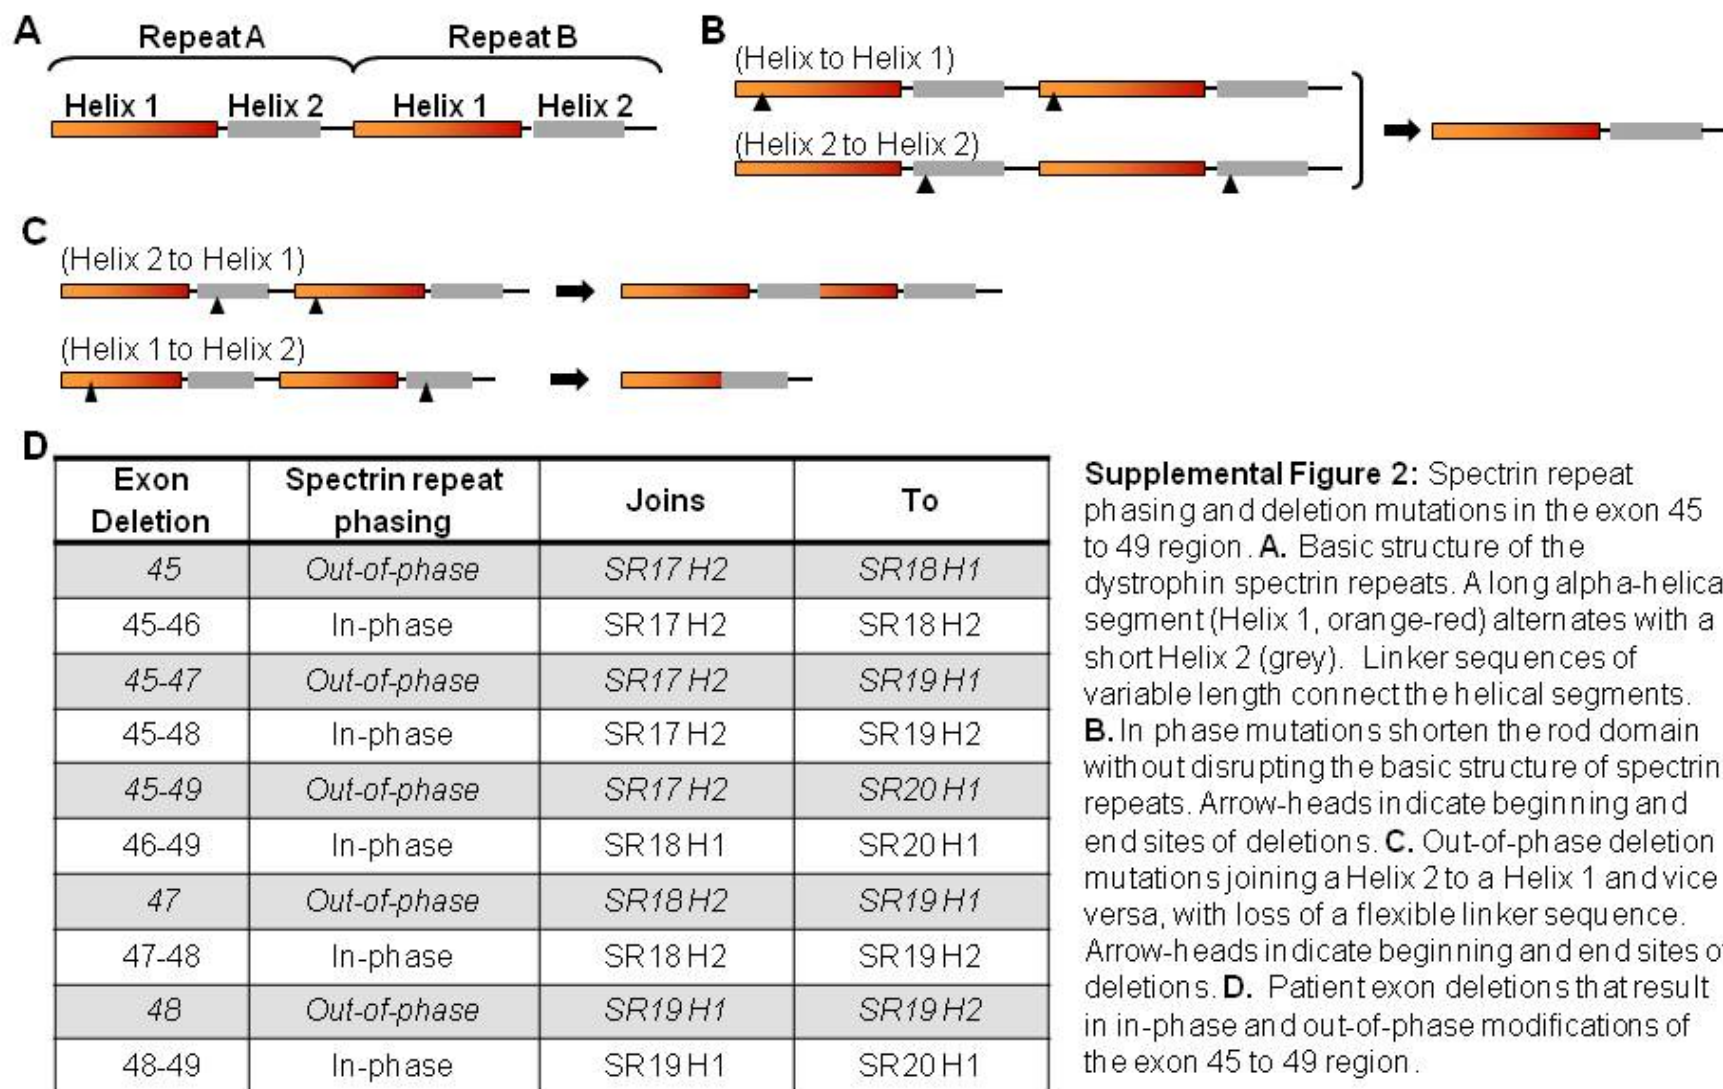

**Supplemental Figure 2:** Spectrin repeat phasing and deletion mutations in the exon 45 to 49 region. **A.** Basic structure of the dystrophin spectrin repeats. A long alpha-helical segment (Helix 1, orange-red) alternates with a short Helix 2 (grey). Linker sequences of variable length connect the helical segments. **B.** In phase mutations shorten the rod domain without disrupting the basic structure of spectrin repeats. Arrow-heads indicate beginning and end sites of deletions. **C.** Out-of-phase deletion mutations joining a Helix 2 to a Helix 1 and vice versa, with loss of a flexible linker sequence. Arrow-heads indicate beginning and end sites of deletions. **D.** Patient exon deletions that result in in-phase and out-of-phase modifications of the exon 45 to 49 region.

Abbreviations: SR: Spectrin Repeat; H1: Helix 1; H2: Helix 2
